# Supplementary material for: Diagnostic Tools for the Identification of Babesia sp. in Persistently Infected Cattle
Source: PubMed Central journal article supplement (PMC6789608; doi:10.3390/pathogens8030143), 2019-09-09
Supplement: pathogens-08-00143-s001.pdf [file pathogens-08-00143-s001.pdf]

**Table S1.** Primers for the PCR assays for *B. bigemina* reviewed in this study.

| Species            | Primer<br>5' – 3'         | Sequence                   | Product length (Bp) | Target gene<br>(Genbank No.) | Reference |
|--------------------|---------------------------|----------------------------|---------------------|------------------------------|-----------|
| <i>B. bigemina</i> |                           | Standard PCR               |                     | (S45366.1)                   |           |
|                    | BiIA                      | CATCTAATTTCTCTCCATACCCCTCC | 278                 | 6–31<br>257–283              | 6, 36, 65 |
|                    | BiIB                      | CCTCGGCTTCAACTCTGATGCCAAAG |                     |                              |           |
|                    |                           | Nested PCR                 |                     |                              |           |
|                    | BiIAN                     | CGCAAGCCCAGCACGCCCCGGTGC   | 170                 | 61–83<br>206–230             |           |
|                    | BiIBN                     | CCGACCTGGATAGGCTGTGTGATG   |                     |                              |           |
|                    |                           | Standard PCR               |                     | SS rRNA (X59604)             |           |
|                    | GAU5                      | TGGCGGCGTTTATTAGTTCG       | 1,124 bp            | 409-428                      | 10        |
|                    | GAU6                      | CCACGCTTGAAGCACAGGA        |                     | 1532-1515                    |           |
|                    |                           | Standard PCR               |                     | AMA-1<br>(AB481200)          |           |
| BI-AMA-FI          | TACTGTGACGAGGACGGATC      | 211 bp                     | 745–764             | 11, 12, 19                   |           |
| BI-AMA-RI          | CCTCAAAAGCAGATTCGAGT      |                            | 936–955             |                              |           |
|                    | Standard PCR              |                            | AMA-1<br>(AB481200) |                              |           |
| BI-AMA-F0          | GTATCAGCCGCCGACCTCCGTAAGT | 738 bp                     | 556–580             | 15, 16, 17                   |           |
| BI-AMA-R0          | GGCGTCAGACTCCAACGGGGAACCG |                            | 1269–1293           |                              |           |
|                    | Nested PCR                |                            |                     |                              |           |
| BI-AMA-FI          | TACTGTGACGAGGACGGATC      | 211 bp                     | 745–764             |                              |           |
| BI-AMA-RI          | CCTCAAAAGCAGATTCGAGT      |                            | 936-955             |                              |           |

---



---

|              |                        |     | RAP-1 $\alpha$<br>(M60879) |        |
|--------------|------------------------|-----|----------------------------|--------|
| Standard PCR |                        |     |                            |        |
|              | GAGTCTGCCAAATCCTTAC    |     |                            |        |
| F            |                        | 879 | ND                         |        |
|              | TCCTCTACAGCTGCTTCG     |     |                            |        |
| R            |                        |     |                            | 16, 19 |
| Nested PCR   |                        |     |                            |        |
|              | AGCTTGCTTTCACAACTCGCC  |     | ND                         |        |
| F            |                        | 412 |                            |        |
|              | TTGGTGCTTTGACCGACGACAT |     |                            |        |
| R            |                        |     |                            |        |

---

ND= Not Defined

**Table S2.** Primers for the PCR assays for *B. bovis* reviewed in this study.

| Species              | Primer<br>5' – 3'          | Sequence                       | Product length (Bp) | Target gene (Genbank No.) | Reference         |
|----------------------|----------------------------|--------------------------------|---------------------|---------------------------|-------------------|
| <i>Babesia bovis</i> |                            |                                |                     | RAP-1<br>(M38218.1)       |                   |
|                      |                            | Standard PCR                   |                     |                           |                   |
|                      | BoF                        | CACGAGGAAGGAACTACCGATGTTGA     | 356                 | 656–681                   | 7, 11, 12, 35, 65 |
|                      | BoR                        | CCAAGGAGCTTCAACGTACGAGGTCA     |                     | 990–1015                  |                   |
|                      |                            | Nested PCR                     |                     |                           |                   |
|                      | BoFN                       | TCAACAAGGTACTCTATATGGCTACC     | 291                 | 690–715                   |                   |
| BoRN                 | CTACCGAGCAGAACCTTCTTCACCAT |                                | 962–987             |                           |                   |
|                      |                            |                                |                     | SSrRNA<br>(L31922)        |                   |
|                      | JD127                      | TTGGCATGGGGGCGACCTTCACCCTCGCCC | 275                 | 428–457                   | 8                 |
|                      | JD111                      | CCAAAGTCAACCAACGGTACGACAGGGTCA |                     | 670–699                   |                   |
|                      |                            |                                |                     | SS rRNA<br>(L31922)       |                   |
|                      | GAU9                       | CTGTCGTACCGTTGGTTGAC           |                     | 409-428                   | 10                |
|                      | GAU10                      | CGCACGGACGGAGACCGA             | 541 bp              | 1215-1198                 |                   |

|              |                                   |      | SBP-2<br>(XM_001611726) |        |
|--------------|-----------------------------------|------|-------------------------|--------|
| Standard PCR |                                   |      |                         |        |
| F            | CCGAATTCCTGGAAGTGGATCTCATGCAACC   |      |                         |        |
| R            | ATCTCGAGTCACGAGCACTCTACGGCTTTGCAG | 1236 | ND                      |        |
|              |                                   |      |                         | 14     |
| Nested PCR   |                                   |      |                         |        |
| F1           | CGAATCTAGGCATATAAGGCAT            |      | ND                      |        |
| R1           | ATCCCCTCCTAAGGTTGGCTAC            | 580  |                         |        |
|              |                                   |      | SBP-4<br>(AB594813)     |        |
| Standard PCR |                                   |      |                         |        |
| F            | AGTTGTTGGAGGAGGCTAAT              |      |                         |        |
| R            | TCCTTCTCGGCGTCCTTTC               | 907  | ND                      |        |
|              |                                   |      |                         | 16, 19 |
| Nested PCR   |                                   |      |                         |        |
| F1           | GAAATCCCTGTTCCAGAG                |      | ND                      |        |
| R1           | TCGTTGATAAACTGCAA                 | 503  |                         |        |

ND= Not Defined.
